# Supplementary material for: Application of Transcriptome Analysis to Understand the Adverse Effects of Hypotonic Stress on Different Development Stages in the Giant Freshwater Prawn Macrobrachium rosenbergii Post-Larvae
Source: MDPI journal article supplement (doi:10.3390/antiox11030440), 2022-02-22
Supplement: s1 [file s1]

**Table S1. Primers used in the study.**

| Genes                 | Primer sequences (5'-3') | Product size (bp) |
|-----------------------|--------------------------|-------------------|
| <i>ATG13</i> (F)      | AGACCAAGAAGGGCTTAGGAGG   | 126               |
| <i>ATG13</i> (R)      | CATCTATAATTGCGAGCGTCCA   |                   |
| <i>ATG3</i> (F)       | GCCGATGGAACTGATGAAGACG   | 141               |
| <i>ATG3</i> (R)       | ACTAGAGGCTGCTGCTGGGAT    |                   |
| <i>Barkor</i> (F)     | AACCAGCCAGAAGTATTGACGC   | 156               |
| <i>Barkor</i> (R)     | AACCAGGCAAAAGAGGATGAAC   |                   |
| <i>ATG7</i> (F)       | GATGGGACCTCGCATGGTAA     | 159               |
| <i>ATG7</i> (R)       | CCAGCCCCTAAAAGCAGACA     |                   |
| <i>Beclin</i> (F)     | TTGCCGAACCTCGCTCTACCG    | 166               |
| <i>Beclin</i> (R)     | GGCTGAGTTTTCTCCGTGTCGT   |                   |
| <i>NRBF2</i> (F)      | AGCAAGCAACGGGAGAAGTATG   | 101               |
| <i>NRBF2</i> (R)      | CTTTTGGACGGGTGAGCAGTA    |                   |
| <i>VMP1</i> (F)       | GGGGCAACGACTCAGGATGA     | 119               |
| <i>VMP1</i> (R)       | TTGTGGTAGCTCTGGGCAAAA    |                   |
| <i>ATG2</i> (F)       | TCGCCGCAATCAGTTACCA      | 142               |
| <i>ATG2</i> (R)       | TTGAATGCCCCCTCACTACTCG   |                   |
| <i>beta-actin</i> (F) | GGCATTACGAGACCACTTACA    | 185               |
| <i>beta-actin</i> (R) | TCGGGAGGTGCGATGATTTT     |                   |
