# Supplementary material for: Application of Transcriptome Analysis to Understand the Adverse Effects of Hypotonic Stress on Different Development Stages in the Giant Freshwater Prawn Macrobrachium rosenbergii Post-Larvae
Source: MDPI journal article supplement (doi:10.3390/antiox11030440), 2022-02-22
Supplement: s1 [file s1]

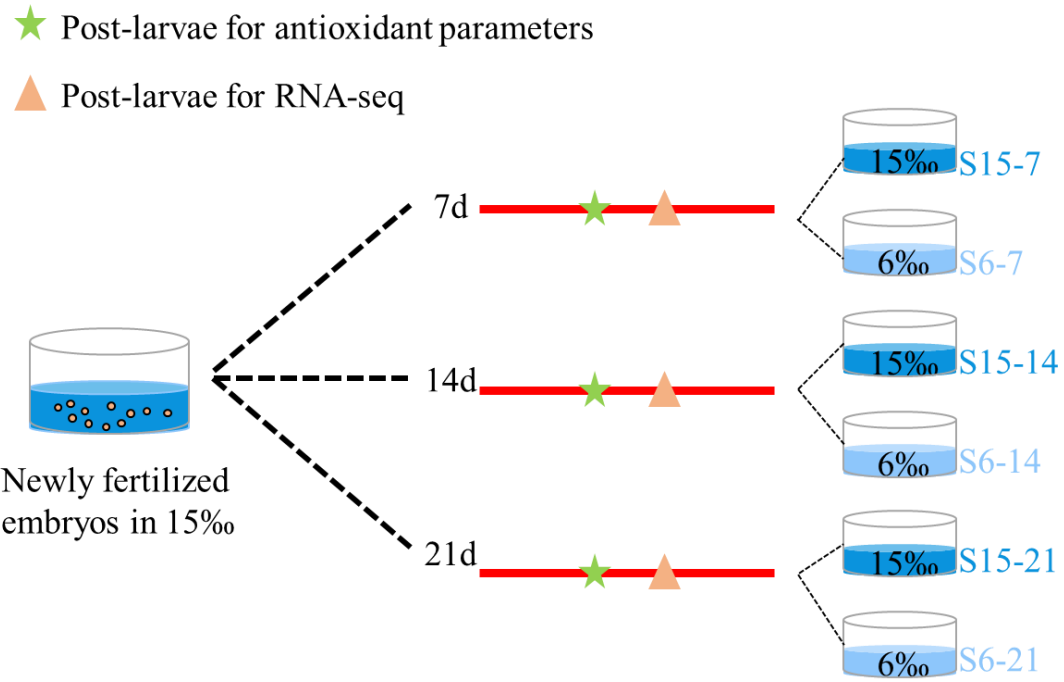

**Figure S1. The experimental design and sampling scheme of this study.**

Acclimation at two salinities (6‰, 15‰) for three development stages. Since embryos fertilized in normal concentration (15‰). Then the collection of corresponding tissues for RNA sequencing and antioxidant parameters.
