# Supplementary material for: Application of Transcriptome Analysis to Understand the Adverse Effects of Hypotonic Stress on Different Development Stages in the Giant Freshwater Prawn Macrobrachium rosenbergii Post-Larvae
Source: MDPI journal article supplement (doi:10.3390/antiox11030440), 2022-02-22
Supplement: s1 [file s1]

**Table S2. Quality control and data statistics for clean reads.**

| Sample   | Raws<br>Reads | Clean<br>Reads | Clean<br>Ratio (%) | Reads<br>Mapped | Mapping<br>Ratio (%) | Clean<br>Q30 (%) | Clean<br>GC (%) |
|----------|---------------|----------------|--------------------|-----------------|----------------------|------------------|-----------------|
| S15-7-1  | 54174512      | 50424296       | 93.08              | 28761402        | 57.04                | 94.20            | 48.08           |
| S15-7-2  | 44664868      | 40939394       | 91.66              | 23814950        | 58.17                | 91.04            | 49.72           |
| S15-7-3  | 49419690      | 45681845       | 92.44              | 26288176        | 57.61                | 92.62            | 48.90           |
| S15-14-1 | 45910602      | 41159624       | 89.65              | 24472746        | 59.46                | 92.44            | 49.53           |
| S15-14-2 | 46433974      | 42378468       | 91.27              | 24756212        | 58.42                | 91.53            | 48.00           |
| S15-14-3 | 46172288      | 41769046       | 90.46              | 24614479        | 58.94                | 91.99            | 48.77           |
| S15-21-1 | 37317656      | 32538180       | 87.19              | 23159374        | 71.18                | 91.33            | 52.94           |
| S15-21-2 | 42917192      | 33839366       | 78.85              | 20774512        | 61.39                | 92.03            | 49.89           |
| S15-21-3 | 40117424      | 33188773       | 82.73              | 21966943        | 66.29                | 91.68            | 51.42           |
| S6-7-1   | 49787776      | 46411224       | 93.22              | 27360974        | 58.95                | 94.32            | 47.01           |
| S6-7-2   | 60433074      | 56567850       | 93.60              | 34090710        | 60.27                | 94.50            | 46.83           |
| S6-7-3   | 55110425      | 51489537       | 93.43              | 30725842        | 59.61                | 94.41            | 46.92           |
| S6-14-1  | 55046066      | 44655876       | 81.12              | 27530732        | 61.65                | 92.75            | 46.02           |
| S6-14-2  | 51561910      | 43314186       | 84.00              | 26175974        | 60.43                | 91.92            | 48.48           |
| S6-14-3  | 53303988      | 43985031       | 82.52              | 26853353        | 61.04                | 92.34            | 47.25           |
| S6-21-1  | 34119258      | 28259706       | 82.83              | 17775644        | 62.90                | 92.14            | 49.66           |
| S6-21-2  | 49575820      | 42177322       | 85.08              | 25130566        | 59.58                | 91.66            | 48.31           |
| S6-21-3  | 41847539      | 35218514       | 84.16              | 21453105        | 61.24                | 91.90            | 48.99           |

Note: S15-7: 7 day-post-hatch larvae in 15‰ salinity; S15-14: 14 day-post-hatch larvae in 15‰ salinity; S15-21: 21 day-post-hatch larvae in 15‰ salinity; S6-7: 7 day-post-hatch larvae in 6‰ salinity; S6-14: 14 day-post-hatch larvae in 6‰ salinity; S6-21: 21 day-post-hatch larvae in 6‰ salinity.
